# Supplementary material
Source: publisher site journal article supplement (https://www.spandidos-publications.com/6812/downloadSupplementary)

Figure S1. Physical doses and dose curves of the observation lesions in the lung (receiving lower dose scattering from nearby high-dose irradiation areas). Physical doses of the observation lesions in the (A) left (denoted as GTV5) and (B) right lungs (denoted as GTV1, GTV2, GTV3 and GTV4). (C-G) Indicates the dose curves for observation lesions 1, 2, 3, 4 and 5, with red arrows pointing to the corresponding observation lesion. GTV, gross tumor volume.

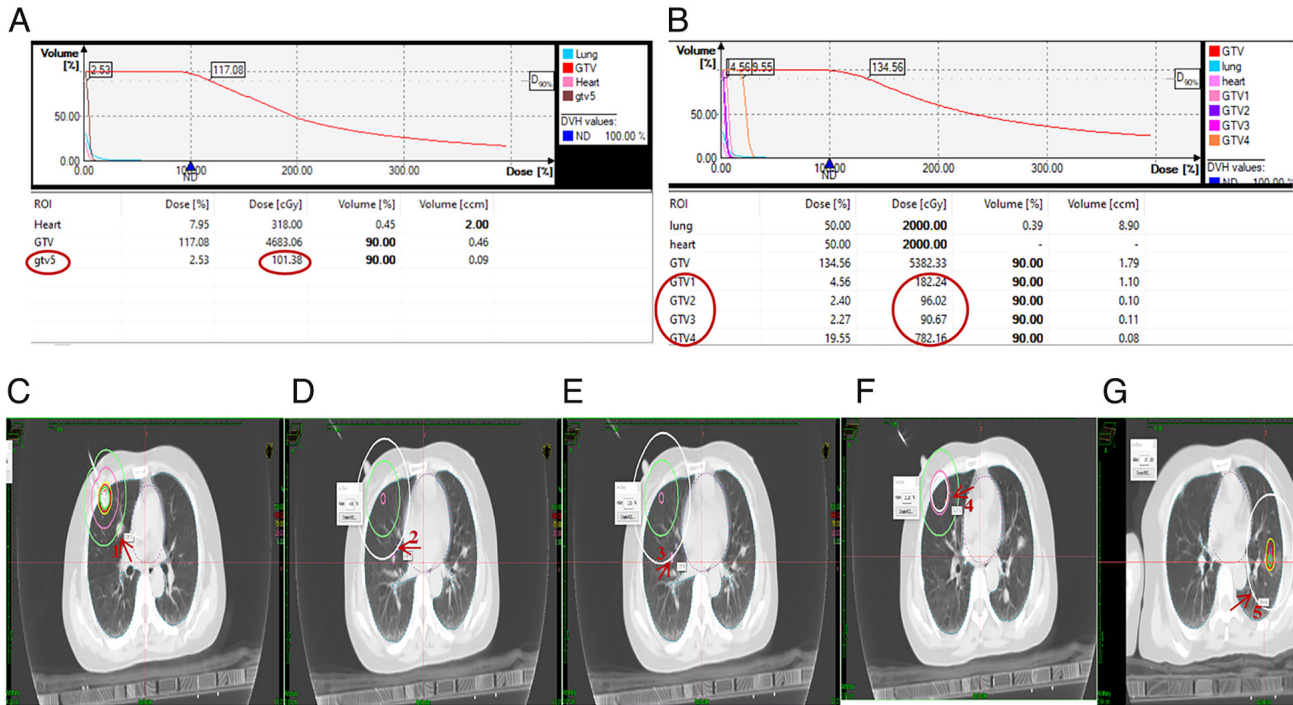

Supplement: Supplementary file 1 [file downloadSupplementary]
